# Supplementary material
Source: PubMed Central journal article supplement (PMC3508694)

## Supporting Digital Content 2. Anti-SHIV gp120 antibody responses in infected macaques.

HIV-1 gp120-specific binding IgG antibodies were measured by ELISA using a 1:10 dilution of plasma. Envelope reactivities are presented as OD450 values, with pre-infection values subtracted. Macaque V234 in the ZFI-treated group (panel C) tested negative by ELISA because of high non-specific binding background, but found to seroconvert by Western Blot analysis. Macaques FN85 and FP24 in the combination group (panel D), however, tested negative in both assays.

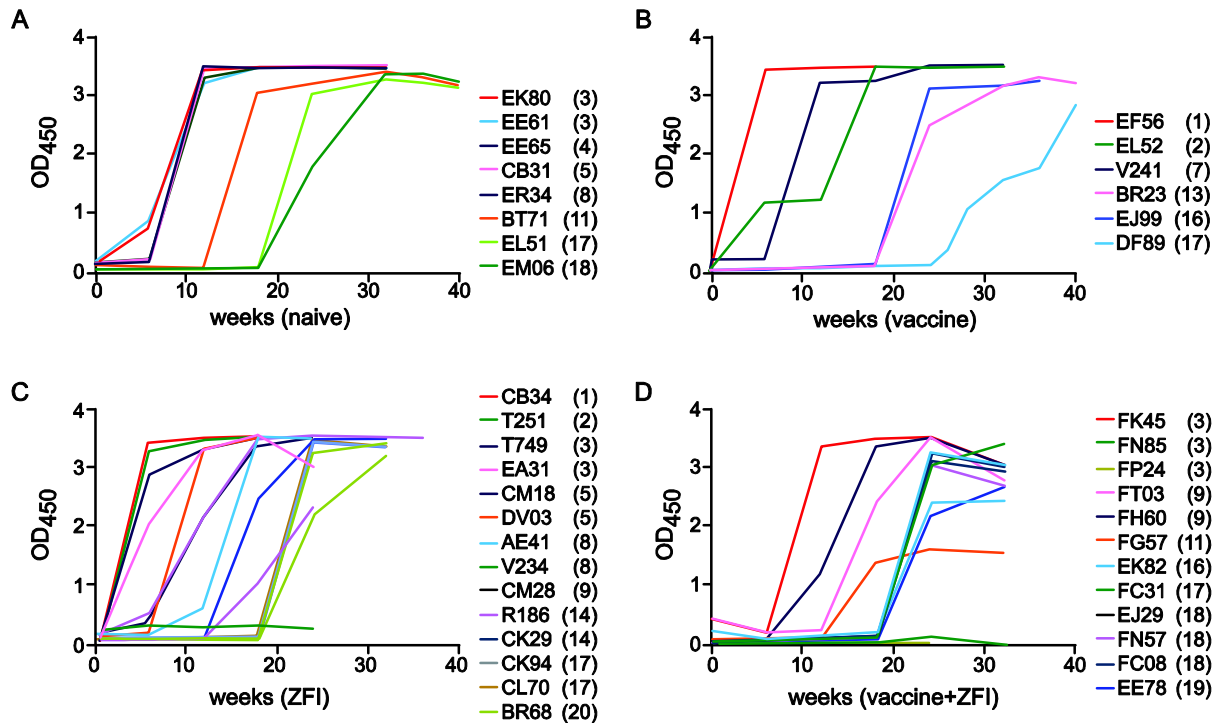

Supplement: NIHMS420544-supplement-Supp_Fig_2.pdf [file NIHMS420544-supplement-Supp_Fig_2.pdf]
